# Supplementary material for: Comparison Study of an Optimized Ultrasound-Based Method versus an Optimized Conventional Method for Agar Extraction, and Protein Co-Extraction, from Gelidium sesquipedale
Source: MDPI journal article supplement (doi:10.3390/foods11060805), 2022-03-11
Supplement: s1 [file s1]

### Energy measurement by using a power meter

The price of the energy required to extract agar by the optimized conventional extraction method and the optimized UAE was calculated by pre-setting the price of energy on 1 €/ kW·h in a power meter. The systems employed were connected to a power meter which was plugged to the electric supply. The energy usage was measured twice per experiment (R1: repetition 1, and R2: repetition 2), except in the case of the ultrasound probe, only measured once.

| Experiment                                                     | Cost of energy in Euros          |
|----------------------------------------------------------------|----------------------------------|
| Optimized conventional extraction (6 h, 110 °C) R <sub>1</sub> | 16.54 (oil bath)                 |
| Optimized conventional extraction (6 h, 110 °C) R <sub>2</sub> | 20.29 (oil bath)                 |
| UAE optimized extraction (1 h, 100% power) R <sub>1</sub>      | 9.53 (water bath)                |
| UAE optimized extraction (1 h, 100% power) R <sub>2</sub>      | 4.90 (water bath) 1.0 (US probe) |
